# Supplementary material for: Trajectories of frailty in aging: Prospective cohort study
Source: PubMed Central journal article supplement (PMC8274857; doi:10.1371/journal.pone.0253976), 2021-07-12
Supplement: pone.0253976.s001.pdf [file pone.0253976.s001.pdf]

**Supplementary Table 1. Health variables used for construction of cumulative frailty index**

| Sl.no | Variable                                   | Coding                                                           |
|-------|--------------------------------------------|------------------------------------------------------------------|
| 1     | Help bathing                               | Yes = 1, No = 0                                                  |
| 2     | Help dressing                              | Yes = 1, No = 0                                                  |
| 3     | Help getting in/out of chair               | Yes = 1, No = 0                                                  |
| 4     | Help walking around house                  | Yes = 1, No = 0                                                  |
| 5     | Help eating                                | Yes = 1, No = 0                                                  |
| 6     | Help grooming                              | Yes = 1, No = 0                                                  |
| 7     | Help using toilet                          | Yes = 1, No = 0                                                  |
| 8     | Help up/down stairs                        | Yes = 1, No = 0                                                  |
| 9     | Help lifting 10 lbs                        | Yes = 1, No = 0                                                  |
| 10    | Help shopping                              | Yes = 1, No = 0                                                  |
| 11    | Help with housework                        | Yes = 1, No = 0                                                  |
| 12    | Help with meal preparations                | Yes = 1, No = 0                                                  |
| 13    | Help taking medication                     | Yes = 1, No = 0                                                  |
| 14    | Help with finances                         | Yes = 1, No = 0                                                  |
| 15    | Lost more than 10 lbs in last year         | Yes = 1, No = 0                                                  |
| 16    | Self rating of health                      | Poor = 1, Fair = 0.75, Good = 0.5, V. Good = 0.25, Excellent = 0 |
| 17    | How health has changed in last year        | Worse = 1, Better/Same = 0                                       |
| 18    | Hospitalized/ER visits                     | Yes = 1, No = 0                                                  |
| 19    | Cut down on usual activity (in last month) | Yes = 1, No = 0                                                  |
| 20    | Walk outside                               | <3 days = 1, ≤ 3 days = 0                                        |
| 21    | Feel everything is an effort               | Most of time = 1, Some time = 0.5, Rarely = 0                    |
| 22    | Feel depressed                             | Most of time = 1, Some time = 0.5, Rarely = 0                    |
| 23    | Feel happy                                 | Most of time = 0, Some time = 0.5, Rarely = 1                    |
| 24    | Health interfered with social activities   | Not at all - Slightly = 0, Moderately - Extremely = 1            |
| 25    | Have trouble getting going                 | Most of time = 1, Some time = 0.5, Rarely = 0                    |
| 26    | Moderate activity affected                 | Yes = 1, No = 0                                                  |
| 27    | High blood pressure                        | Yes = 1, No = 0                                                  |
| 28    | Heart attack                               | Yes = 1, No = 0                                                  |
| 29    | CHF                                        | Yes = 1, No = 0                                                  |
| 30    | Stroke                                     | Yes = 1, No = 0                                                  |
| 31    | Cancer                                     | Yes = 1, No = 0                                                  |
| 32    | Diabetes                                   | Yes = 1, No = 0                                                  |
| 33    | Arthritis                                  | Yes = 1, No = 0                                                  |
| 34    | Chronic lung disease                       | Yes = 1, No = 0                                                  |
| 35    | Cognitive test: Blessed                    | <2=0: 2-3=0.25: 4-7=0.50: >7 =1                                  |
| 36    | Peak flow                                  | Men=<340 liters/min; Women=<310 liters/min                       |
| 37    | BMI                                        | 1 if BMI <18.5 or >=30                                           |

|    |                                |                                                                                                                                                                                                                                                       |
|----|--------------------------------|-------------------------------------------------------------------------------------------------------------------------------------------------------------------------------------------------------------------------------------------------------|
| 38 | Grip strength                  | Men BMI= $\leq$ 24, GS= $\leq$ 29 : Men BMI 24.1-28,<br>GS= $\leq$ 30:Men BMI $>$ 28, GS= $\leq$ 32:<br>Women BMI= $\leq$ 23, GS= $\leq$ 17:Women BMI 23.1-26,<br>GS= $\leq$ 17.3:Women BMI 26.1-29,GS= $\leq$ 18: Women BMI<br>$>$ 29, GS= $\leq$ 21 |
| 39 | Falls                          | Yes = 1, No = 0                                                                                                                                                                                                                                       |
| 40 | Memory changes                 | Yes = 1, No = 0                                                                                                                                                                                                                                       |
| 41 | History of Parkinson's disease | Yes = 1, No = 0                                                                                                                                                                                                                                       |

---

**Supplementary table 2. Post hoc analysis of association of frailty trajectories with mortality.** Model adjusted for cohort status and covariates presented below.

| <b>Variables</b>                   | <b>Hazard ratio (95% confidence intervals)</b> |
|------------------------------------|------------------------------------------------|
| <b>Frailty trajectories</b>        |                                                |
| Relatively stable                  | Reference                                      |
| Mild frail                         | 2.88 (1.38 - 6.04)                             |
| Moderate frail                     | 2.62 (1.08 – 6.36)                             |
| Severely frail                     | 5.47 (1.82 – 16.45)                            |
| Age, years                         | 1.08 (1.04 – 1.12)                             |
| Male sex                           | 2.24 (1.51 – 3.32)                             |
| Education, years                   | 0.99 (0.93 – 1.06)                             |
| Frailty Index score                | 1.56 (0.04 – 55.71)                            |
| Comorbidities score                | 1.02 (0.82 – 1.27)                             |
| Walking speed, cm/s                | 0.99 (0.98 – 1.00)                             |
| Body mass index, kg/m <sup>2</sup> | 0.96 (0.92 – 1.01)                             |
| Free recall score                  | 1.00 (0.96 – 1.04)                             |
| DSST score*                        | 0.81 (0.66 – 1.00)                             |

\***DSST:** Digit symbol substitution test. Scores were standardized as timing of administration varied between LonGenity (90 seconds) and Einstein Aging study (60 seconds).

**Supplementary Table 3. Proteomics and frailty trajectories.** Eleven significant SOMAmer reagent targets associated with frailty trajectories; linear regression comparing the combined frail trajectory groups versus the relatively stable trajectory group as reference.

| Somald   | Target | Target Full Name                                                     | UniProt | Estimate | Std Error | p value  |
|----------|--------|----------------------------------------------------------------------|---------|----------|-----------|----------|
| SL001774 | H-FABP | Fatty acid-binding protein,<br>heart                                 | P05413  | 0.148    | 0.027     | 6.08E-08 |
| SL008782 | CSPG3  | Neurocan core protein                                                | O14594  | -0.127   | 0.025     | 6.73E-07 |
| SL000498 | Leptin | Leptin                                                               | P41159  | 0.267    | 0.054     | 8.62E-07 |
| SL018710 | CA2D3  | Voltage-dependent<br>calcium channel subunit<br>alpha-2/delta-3      | Q8IZS8  | -0.094   | 0.020     | 2.89E-06 |
| SL008968 | DNER   | Delta and Notch-like<br>epidermal growth factor-<br>related receptor | Q8NFT8  | -0.094   | 0.020     | 3.39E-06 |
| SL005086 | FABPA  | Fatty acid-binding protein,<br>adipocyte                             | P15090  | 0.126    | 0.027     | 3.85E-06 |
| SL002644 | ERBB1  | Epidermal growth factor<br>receptor                                  | P00533  | -0.053   | 0.011     | 3.9E-06  |
| SL011048 | ANTR2  | Anthrax toxin receptor 2                                             | P58335  | -0.102   | 0.022     | 6.15E-06 |

|          |             |                                        |        |        |       |          |
|----------|-------------|----------------------------------------|--------|--------|-------|----------|
| SL010377 | OMGP        | Oligodendrocyte-myelin<br>glycoprotein | P23515 | -0.162 | 0.036 | 7.78E-06 |
| SL004855 | contactin-1 | Contactin-1                            | Q12860 | -0.066 | 0.015 | 7.88E-06 |
| SL000070 | Glypican 3  | Glypican-3                             | P51654 | -0.101 | 0.023 | 9.08E-06 |

---

$\log(\text{SOMAmer}) \sim \text{Trajectory Group} + \text{Age} + \text{Gender} + \text{OPEL-OPUS status}$
